# Supplementary material for: Evolution-guided mutagenesis of the cytoplasmic incompatibility proteins: Identifying CifA’s complex functional repertoire and new essential regions in CifB
Source: PLoS Pathog. 2020 Aug 19;16(8):e1008794. doi: 10.1371/journal.ppat.1008794 (PMC7458348; doi:10.1371/journal.ppat.1008794)
Supplement: S4 Table — (XLSX) [file ppat.1008794.s005.xlsx]

## Sheet: S4 Table
Table S4. Primers used for genotyping and sanger sequencing of cif transgenes.
Amplicon	Direction	Name	Sequence
1	Forward	pTIGMCS_F	GAGGAAAGGTTGTGTGCGGACGA
	Reverse	MelA1208_R	AGCCCTCCACGGCATCGTACTT
2	Forward	MelA1072_F	TAGCCAGGGCAACCCAATCTCG
	Reverse	MelA1763_R	TGCACACATCCTCGCGCTTC
3	Forward	MelA1667_F	TACCGCGAGACCAGCGTGAA
	Reverse	pTIGMCS_R	CGAATTGGTGCTATGTTTATGGCGCT
